# Supplementary material
Source: ML conference proceedings conference paper supplement (https://proceedings.neurips.cc/paper_files/paper/2019/hash/5dcd0ddd3d918c70d380d32bce4e733a-Abstract.html)
Supplement: Supplementary file [file 5dcd0ddd3d918c70d380d32bce4e733a-Supplemental.zip]

## A Proof

**Proof of Theorem 1** Let  $e_\ell$  be the column vector with 1 in  $\ell^{th}$  coordinate and 0 elsewhere. By the RKHS reproducing property (7) we have

$$\begin{aligned}
\mathbb{E}_{\mathbf{x} \sim q} [\mathcal{P}^\top \phi(\mathbf{x})] &= \mathbb{E}_{\mathbf{x} \sim q} [\nabla_{\mathbf{x}} \log p(\mathbf{x})^\top \phi(\mathbf{x}) + \nabla_{\mathbf{x}}^\top \phi(\mathbf{x})] \\
&= \mathbb{E}_{\mathbf{x} \sim q} \left[ \phi(\mathbf{x})^\top \nabla_{\mathbf{x}} \log p(\mathbf{x}) + \sum_{\ell=1}^d \nabla_{x^\ell} \phi(\mathbf{x})^\top e_\ell \right] \\
&= \mathbb{E}_{\mathbf{x} \sim q} \left[ \langle \phi(\cdot), \mathbf{K}(\cdot, \mathbf{x}) \nabla_{\mathbf{x}} \log p(\mathbf{x}) \rangle_{\mathcal{H}_K} + \sum_{\ell=1}^d \nabla_{x^\ell} \langle \phi(\cdot), \mathbf{K}(\cdot, \mathbf{x}) e_\ell \rangle_{\mathcal{H}_K} \right] \\
&= \left\langle \phi(\cdot), \mathbb{E}_{\mathbf{x} \sim q} \left[ \mathbf{K}(\cdot, \mathbf{x}) \nabla_{\mathbf{x}} \log p(\mathbf{x}) + \sum_{\ell=1}^d \nabla_{x^\ell} \mathbf{K}(\cdot, \mathbf{x}) e_\ell \right] \right\rangle_{\mathcal{H}_K} \\
&= \langle \phi(\cdot), \mathbb{E}_{\mathbf{x} \sim q} [\mathbf{K}(\cdot, \mathbf{x}) \nabla_{\mathbf{x}} \log p(\mathbf{x}) + \mathbf{K}(\cdot, \mathbf{x}) \nabla_{\mathbf{x}}] \rangle_{\mathcal{H}_K} \\
&= \langle \phi(\cdot), \mathbb{E}_{\mathbf{x} \sim q} [\mathbf{K}(\cdot, \mathbf{x}) \mathcal{P}] \rangle_{\mathcal{H}_K},
\end{aligned}$$

The optimization in (8) is hence

$$\max_{\phi \in \mathcal{H}_K} \langle \phi(\cdot), \mathbb{E}_{\mathbf{x} \sim q} [\mathbf{K}(\cdot, \mathbf{x}) \mathcal{P}] \rangle_{\mathcal{H}_K}, \quad s.t. \quad \|\phi\|_{\mathcal{H}_K} \leq 1,$$

whose solution is  $\phi^*(\cdot) \propto \mathbb{E}_{\mathbf{x} \sim q} [\mathbf{K}(\cdot, \mathbf{x}) \mathcal{P}]$ .

**Proof of Lemma 2** This is a basic result of RKHS, which can be found in classical textbooks such as [Paulsen & Raghupathi (2016)]. The key idea is to show that  $\mathbf{K}(\mathbf{x}, \mathbf{x}')$  satisfies the reproducing property for  $\mathcal{H}$ . Recall the reproducing property of  $\mathcal{H}_0$ :

$$\phi_0(\mathbf{x})^\top \mathbf{c} = \langle \phi_0, \mathbf{K}_0(\cdot, \mathbf{x}) \mathbf{c} \rangle_{\mathcal{H}_0}, \quad \forall \mathbf{c} \in \mathbb{R}^d.$$

Taking  $\phi(\mathbf{x}) = M(\mathbf{x}) \phi_0(t(\mathbf{x}))$ , we have

$$\begin{aligned}
\phi(\mathbf{x})^\top \mathbf{c} &= \langle \phi_0, \mathbf{K}_0(\cdot, t(\mathbf{x})) M(\mathbf{x})^\top \mathbf{c} \rangle_{\mathcal{H}_0} \\
&= \langle \phi, M(\cdot) \mathbf{K}_0(t(\cdot), t(\mathbf{x})) M(\mathbf{x})^\top \mathbf{c} \rangle_{\mathcal{H}} \\
&= \langle \phi, \mathbf{K}(\cdot, \mathbf{x}) \mathbf{c} \rangle_{\mathcal{H}},
\end{aligned}$$

where the second step follows  $\langle \phi, \phi' \rangle_{\mathcal{H}} = \langle \phi_0, \phi'_0 \rangle_{\mathcal{H}_0}$  with  $\phi'_0(\cdot) = \mathbf{K}_0(\cdot, t(\mathbf{x})) M(\mathbf{x})^\top \mathbf{c}$ .

### Proof of Theorem 3

*Proof.* Note that KL divergence is invariant under invertible variable transforms, that is,

$$\text{KL}(q_{[\epsilon\phi]} \parallel p) = \text{KL}(q_{[\epsilon\phi]0} \parallel p_0). \quad (20)$$

where  $p_0$  denotes the distribution of  $\mathbf{x}_0 = t(\mathbf{x})$  when  $\mathbf{x} \sim p$ , and  $q_{[\epsilon\phi]0}$  denotes the distribution of  $\mathbf{x}'_0 = t(\mathbf{x}')$  when  $\mathbf{x}' \sim q_{[\epsilon\phi]}$ . Recall that  $q_{[\epsilon\phi]}$  is defined as the distribution of  $\mathbf{x}' = \mathbf{x} + \epsilon\phi(\mathbf{x})$  when  $\mathbf{x} \sim q$ .

Denote by  $t^{-1}$  the inverse map of  $t$ , that is,  $t^{-1}(t(\mathbf{x})) = \mathbf{x}$ . We can see that  $\mathbf{x}'_0 \sim q_{[\epsilon\phi]0}$  can be obtained by

$$\begin{aligned}
\mathbf{x}'_0 &= t(\mathbf{x}') \quad // \mathbf{x}' \sim q_{[\epsilon\phi]} \\
&= t(\mathbf{x} + \epsilon\phi(\mathbf{x})) \quad // \mathbf{x} \sim q \\
&= t(t^{-1}(\mathbf{x}_0) + \epsilon\phi(t^{-1}(\mathbf{x}_0))) \quad // \mathbf{x}_0 \sim q_0 \\
&= \mathbf{x}_0 + \epsilon \nabla t(t^{-1}(\mathbf{x}_0)) \phi(t^{-1}(\mathbf{x}_0)) + \mathcal{O}(\epsilon^2) \\
&= \mathbf{x}_0 + \epsilon \phi_0(\mathbf{x}_0) + \mathcal{O}(\epsilon^2),
\end{aligned} \quad (21)$$

where we used the definition that  $\phi(\mathbf{x}) = \nabla t(\mathbf{x})^{-1} \phi_0(t(\mathbf{x}))$  in (11), and  $\mathcal{O}(\cdot)$  is the big-O notation.

From Theorem 3.1 of [Liu & Wang \(2016\)](#), we have

$$\left. \frac{d}{d\epsilon} \text{KL}(q_{[\epsilon\phi]} || p) \right|_{\epsilon=0} = -\mathbb{E}_q[\mathcal{P}^\top \phi].$$

Using Equation [\(21\)](#) and derivation similar to Theorem 3.1 of [Liu & Wang \(2016\)](#), we can show

$$\left. \frac{d}{d\epsilon} \text{KL}(q_{[\epsilon\phi]_0} || p_0) \right|_{\epsilon=0} = -\mathbb{E}_{q_0}[\mathcal{P}_0^\top \phi_0].$$

Combining these with [\(20\)](#) proves [\(11\)](#).

Following Lemma [2](#), when  $\phi_0$  is in  $\mathcal{H}_0$  with kernel  $\mathbf{K}_0(\mathbf{x}, \mathbf{x}')$ ,  $\phi$  is in  $\mathcal{H}$  with kernel  $\mathbf{K}(\mathbf{x}, \mathbf{x}')$ . Therefore, maximizing  $\mathbb{E}_q[\mathcal{P}^\top \phi]$  in  $\mathcal{H}$  is equivalent to  $\mathbb{E}_{q_0}[\mathcal{P}_0^\top \phi_0]$  in  $\mathcal{H}_0$ . This suggests the trajectory of SVGD on  $p_0$  with  $\mathbf{K}_0$  and that on  $p$  with  $\mathbf{K}$  are equivalent.

□

## B Toy Examples

Figure 3 and Figure 4 show results of different algorithms on three 2D toy distributions: Star, Double banana and Sine. Detailed information of these distributions and more results are shown in Section B.1-B.3

We can see from Figure 3-4 that both variants of matrix SVGD consistently outperform SVN and vanilla SVGD. We also find that Matrix SVGD (mixture) tends to outperform Matrix SVGD (average), which is expected since Matrix SVGD (average) uses a constant preconditioning matrix for all the particles, and can not capture different curvatures at different locations. Matrix SVGD (mixture) yields the best performance in general.

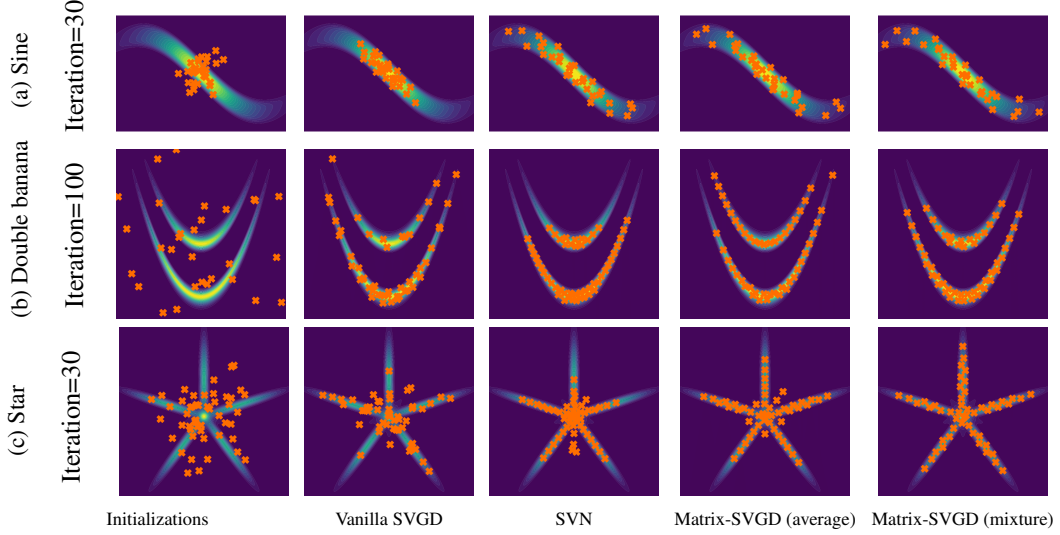

Figure 3: The particles obtained by various methods at the 30/100/30-th iteration on three toy 2D distributions.

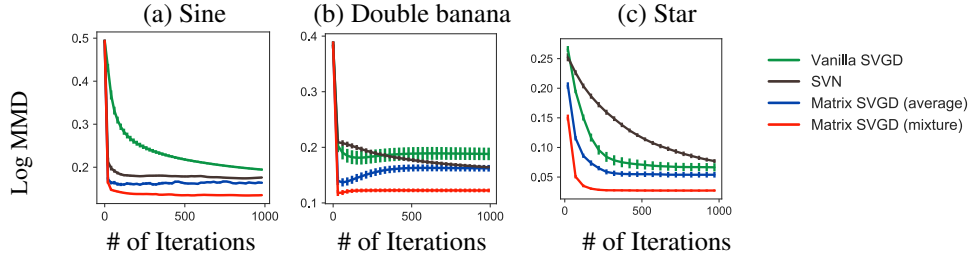

Figure 4: The MMD vs. training iteration of different algorithms on the three toy distributions.

## B.1 Sine

The density function of the “Sine” distribution is defined by

$$p(x_1, x_2) \propto \exp\left(\frac{-(x_2 + \sin(\alpha x_1))^2}{2\sigma_1} - \frac{x_1^2 + x_2^2}{2\sigma_2}\right),$$

where we choose  $\alpha = 1$ ,  $\sigma_1 = 0.003$ ,  $\sigma_2 = 1$ .

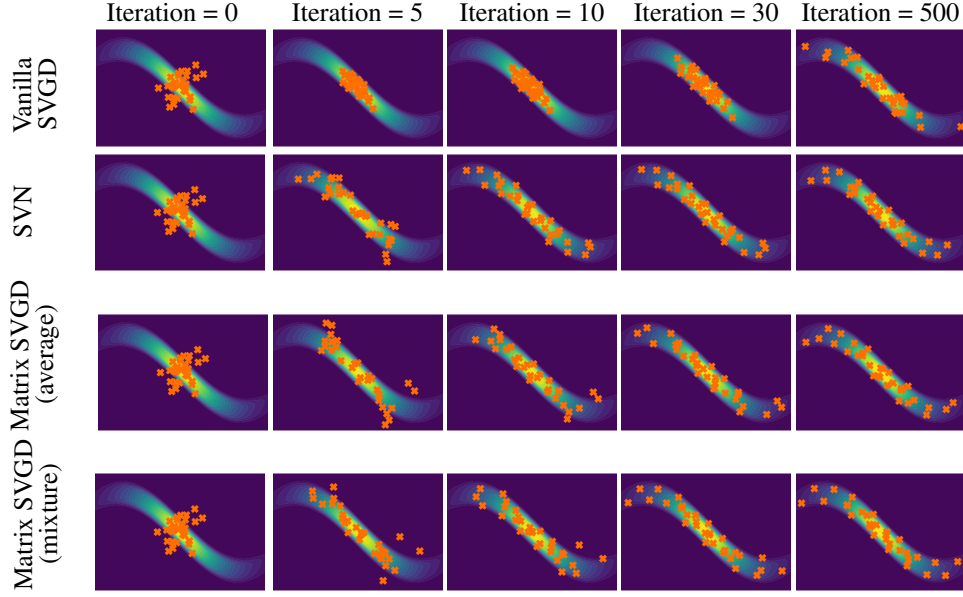

Figure 5: The particles obtained by various methods on the toy Sine distribution.

## B.2 Double Banana

We use the “double banana” distribution constructed in [Detommaso et al. \(2018\)](#), whose probability density function is

$$p(\mathbf{x}) \propto \exp \left( -\frac{\|\mathbf{x}\|_2^2}{2\sigma_1} - \frac{(y - F(\mathbf{x}))^2}{2\sigma_2} \right),$$

where  $\mathbf{x} = [x_1, x_2] \in \mathbb{R}^2$  and  $F(\mathbf{x}) = \log((1 - x_1)^2 + 100(x_2 - x_1^2)^2)$  and  $y = \log(30)$ ,  $\sigma_1 = 1.0$ ,  $\sigma_2 = 0.09$ .

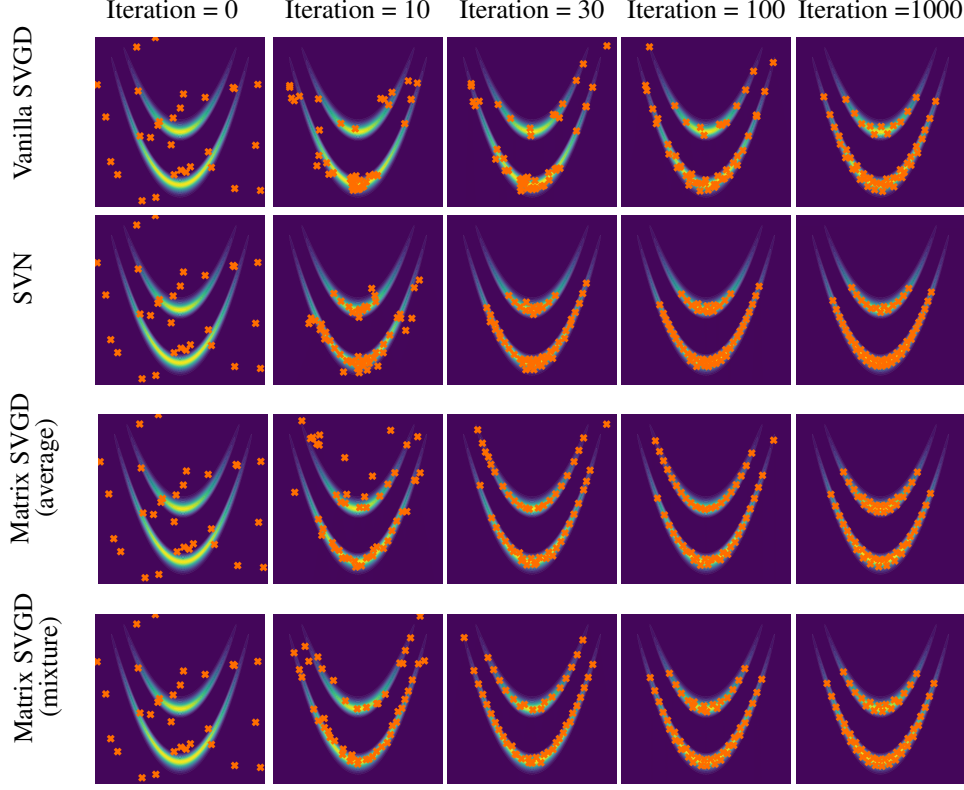

Figure 6: The particles obtained by various methods on the double banana distribution.

### B.3 Star

We construct the “star” distribution with a Gaussian mixture model, whose density function is

$$p(\mathbf{x}) = \frac{1}{K} \sum_{i=1}^K \mathcal{N}(\mathbf{x}; \boldsymbol{\mu}_i, \boldsymbol{\Sigma}_i),$$

with  $\mathbf{x} \in \mathbb{R}^2$ ,  $\boldsymbol{\mu}_1 = [0; 1.5]$ ,  $\boldsymbol{\Sigma}_1 = \text{diag}([1; \frac{1}{100}])$ , and the other means and covariance matrices are defined by rotating their previous mean and covariance matrix. To be precise,

$$\boldsymbol{\mu}_{i+1} = \mathbf{U} \boldsymbol{\mu}_i, \quad \boldsymbol{\Sigma}_{i+1} = \mathbf{U} \boldsymbol{\Sigma}_i \mathbf{U}^\top, \quad \mathbf{U} = \begin{bmatrix} \cos(\theta) & \sin(\theta) \\ -\sin(\theta) & \cos(\theta) \end{bmatrix},$$

with angle  $\theta = \frac{2\pi}{K}$ . We set the number of component  $K$  to be 5.

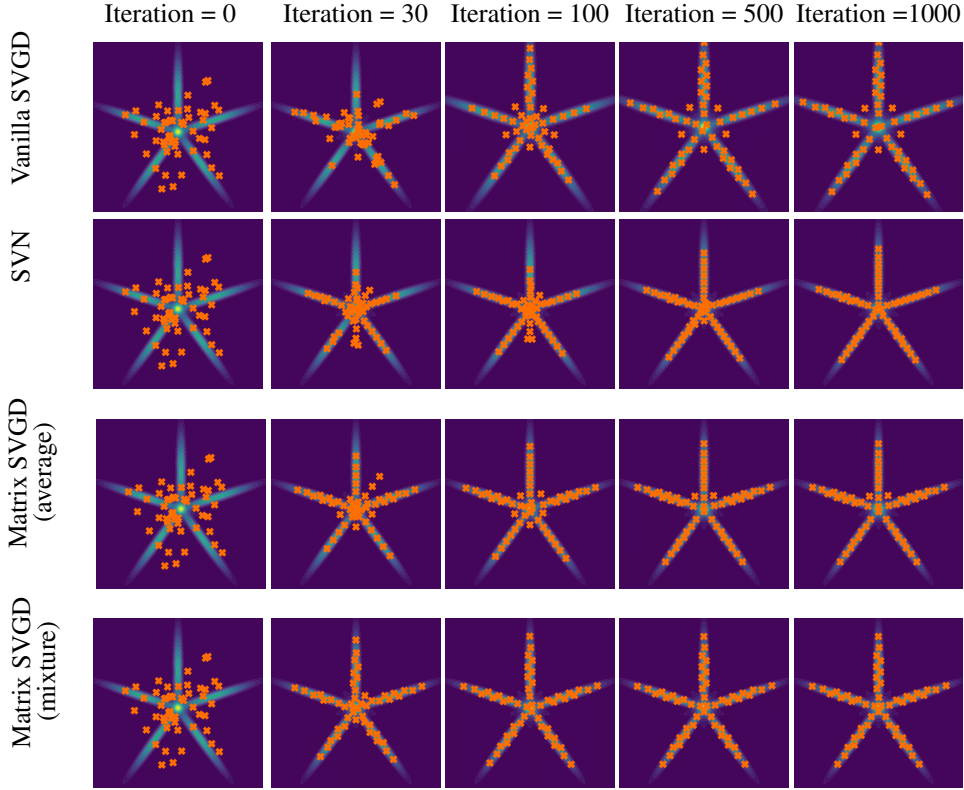

Figure 7: The particles obtained by various methods on the star-shaped distribution.
